# Supplementary material for: Strategy to develop a MAO-A-resistant 5-hydroxy-l-[β-11C]tryptophan isotopologue based on deuterium kinetic isotope effects
Source: Springer Nature journal article supplement (doi:10.1186/s13550-014-0062-2), 2014-11-29
Supplement: MOESM6 [file 9786262]

# Individual 1

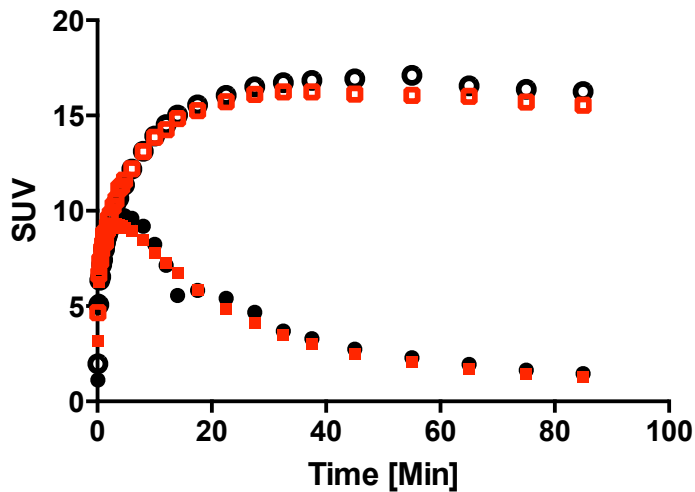

# Individual 2

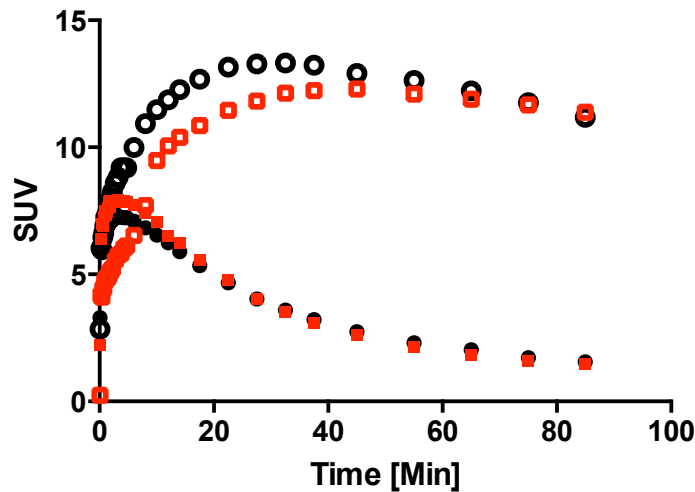

- HTP baseline
- HTP Clorgyline
- DHTP Baseline
- DHTP Clorgyline

# Liver

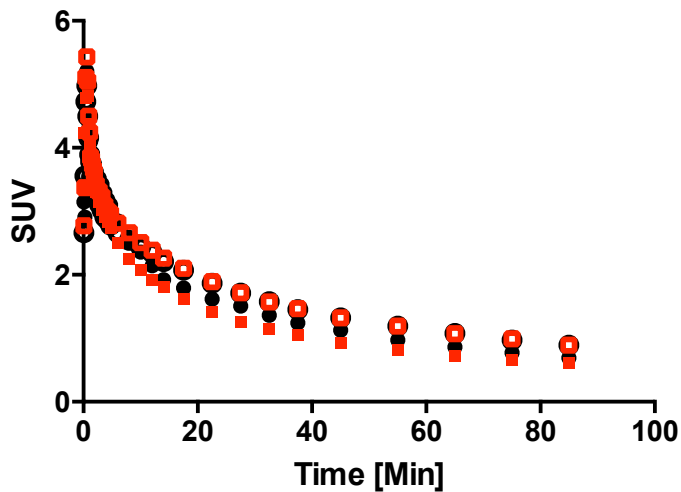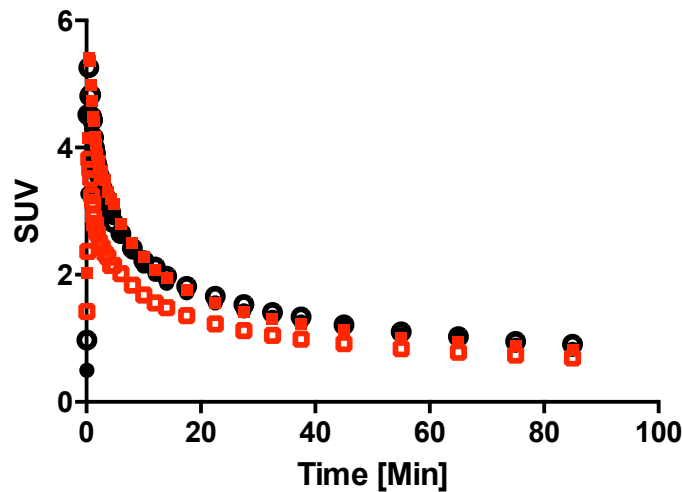

- HTP baseline
- HTP Clorgyline
- DHTP Baseline
- DHTP Clorgyline
