# Supplementary figures and images for: Strategy to develop a MAO-A-resistant 5-hydroxy-l-[β-11C]tryptophan isotopologue based on deuterium kinetic isotope effects
Source: Springer Nature journal article supplement (doi:10.1186/s13550-014-0062-2), 2014-11-29

Baseline

DHTP

HTP

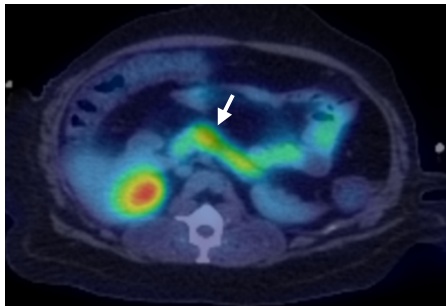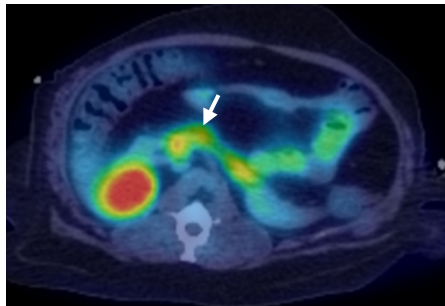

Clorgyline

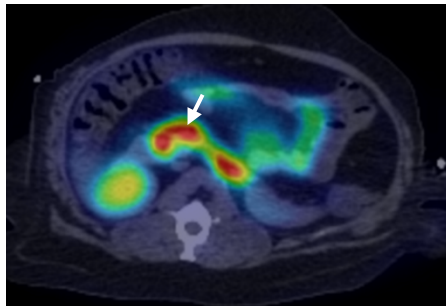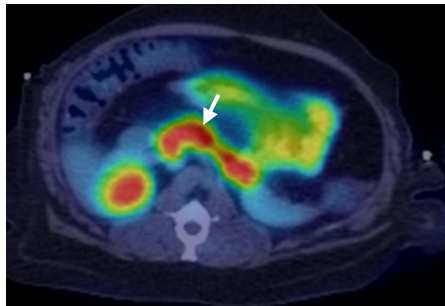

7

SUV

0

Supplement: MOESM5 [file 9786262]
